# Supplementary material for: A new vesicle trafficking regulator CTL1 plays a crucial role in ion homeostasis
Source: PLoS Biol. 2017 Dec 28;15(12):e2002978. doi: 10.1371/journal.pbio.2002978 (PMC5746208; doi:10.1371/journal.pbio.2002978)
Supplement: S2 Table — Data represents means ± SE, p-values were calculated by Student t test, n = 7. Col-0, Columbia-0; sic1, significant ionome changes 1. (XLSX) [file pbio.2002978.s013.xlsx]

## Sheet: Sheet1
Elements	Leaf ionome of Col-0 and sic1 grown in Hoagland’s solution
	Col-0	sic1	sic1 percentage difference from Col-0	p - values
	(μg/g, dry weight)	(μg/g, dry weight)
Li	3.39 ± 0.11	5.25 ± 0.13	55.1	1.1119e-07
B	698.91 ± 19.54	1031.68 ± 50.57	47.61	5.67555e-05
Na	2781.08 ± 129.16	5466.12 ± 334.07	96.55	7.51426e-06
P	13196.47 ± 494.87	8621.36 ± 233.81	-34.67	4.42113e-07
S	19356.92 ± 947.24	27763.67 ± 1779.03	43.43	0.00138702
K	76225.34 ± 3467.42	60814.4 ± 2426.46	-20.22	0.0018684
Ca	21456.23 ± 532.04	16562.1 ± 608.04	-22.81	3.57781e-05
Mn	39.64 ± 2.64	14.69 ± 0.37	-60.68	6.4052e-06
Fe	99.98 ± 4.84	60.6 ± 3.83	-39.39	1.44097e-05
Ni	1.13 ± 0.08	0.69 ± 0.03	-38.83	0.00010874
Cu	6.33 ± 0.32	4.5 ± 0.25	-28.97	0.00042444
Zn	103.10 ± 1.87	67.26± 2.92	-34.77	1.72e-09
Se	35.09 ± 4.31	71.06 ± 5.67	102.49	0.000226398
Mo	17.03 ± 1.52	2.38 ± 0.23	-0.86	1.51e-07
